# Supplementary figures and images for: The 2D microfluidics cookbook – modeling convection and diffusion in plane flow devices
Source: Royal Society of Chemistry journal article supplement (doi:10.1039/d2lc01033j), 2023-01-01

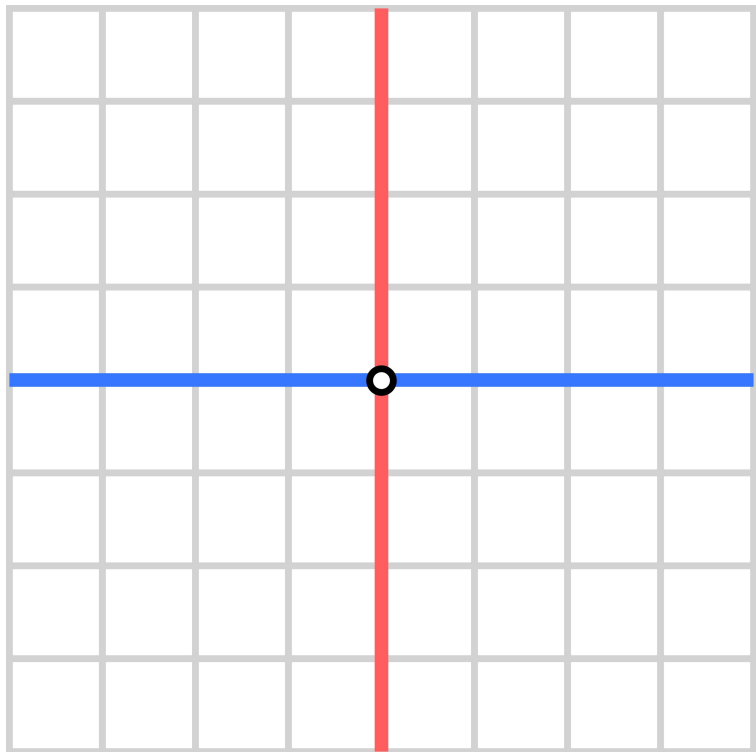

Supplement: d2lc01033j3.pdf [file d2lc01033j3.pdf]
